# Supplementary material
Source: MDPI journal article supplement (https://www.mdpi.com/2075-4655/7/1/2)
Supplement: s1 [file s1]

# Sex-specific miRNA differences in liquid biopsies from subjects with solid tumors and healthy controls

Elena Tomeva, Ulrike D. B. Krammer, Olivier J. Switzeny, Alexander G. Haslberger and Berit Hippe

Supplementary file 2: Table S1. Genes and regions analyzed for methylation status.

| Gene           | NCBI Reference Sequence | Region              | Sequence                                                                                                                              |
|----------------|-------------------------|---------------------|---------------------------------------------------------------------------------------------------------------------------------------|
| <i>ALKBH3</i>  | NC_000011.10            | 43880721-43880820   | ctaccggac tgaggactgc gcaccggaag tagtggcggc<br>gctgcgtaac gtcgagagga agtgctgat gccgcggcct<br>gtgattggga gttgctggag                     |
| <i>APC</i>     | NC_000005.10            | 112737681-112737780 | ctagggctag gcaggctgtg cggttgggcg gggccctgtg<br>ccccactcg gagtgcgggt cggaagcgg agagagaagc<br>agctgtgtaa tccgctggat                     |
| <i>GATA5</i>   | NC_000020.11            | 62475990-62476090   | aagactggaa gcccgggccc ctgaggctcc gcagccccct<br>ccgcgccgcc ccggcccgcc ccgcgcgc cgccttcc<br>ctccccgcgc ccgcccttc t                      |
| <i>GSTP1</i>   | NC_000011.10            | 67583636-67583735   | ctccggggac tccaggggcg ccctctcgg ccgacccccg<br>gggtgcagcg gccgccgggg ctggggccgg cgggagtcg<br>cgggaccctc cagaagagcg                     |
| <i>MDR1</i>    | NC_000007.14            | 87600483-87600384   | ggcagagttg ggggtctggc agcgcgttct ggactttgcc<br>cgccgccagt gcgattctcc ctccgggtc cagtgcgcgc<br>ggacgatgct tctcccacc                     |
| <i>MGMT</i>    | NC_000010.11            | 129467232-129467305 | cgcccctaga acgctttgcg tcccagccc cgcaggtcct<br>cgcggtgcgc accgtttgcg acttggtgag tgtc                                                   |
| <i>MLH1</i>    | NC_000003.12            | 36992887-36993005   | tattcgtgct cagcctcgtg gtggcgctg acgtcgcgtt<br>cgcgggtagc tacgatgagg cggcgacaga ccaggcacag<br>ggcccatcg cctccggag gctccaccac caaataacg |
| <i>RASSF1A</i> | NC_000003.12            | 50340772 - 50340673 | gccgtgtggg gttgcacgcg gtgccccgcg cgatgcgcag<br>cgcgttgga cgtccagcc ggggtcggcc cttccagcg<br>cgccagcgg gtgcccagtc                       |
| <i>SEPTIN9</i> | NC_000017.11            | 77373482-77373543   | ctgccacca gccatcatgt cggacccgc ggtcaacgcg<br>cagctggatg ggtcatttc gg                                                                  |
| <i>SFN</i>     | NC_000001.11            | 26863259-26863372   | ccgaacgcta ttaggacatg gcagccttca tgaaaggcg<br>cgtggagaag ggagaggagc tctctgcga agagcgaac<br>ctgctctcag tagcctataa gaacgtggtg ggcg      |
| <i>SHOX2</i>   | NC_000003.12            | 158103869-158103755 | cgaccctaaa cgcttaacc acagagatca acaggttcaa<br>gcggaatatt cgcgatctc ggttctatt ggtgtctcaa agcctttca<br>tgcaaccagc agctcgatg tttaa       |
| <i>VIM</i>     | NC_000010.11            | 17229166-17229265   | gcttctcgt aggtccctat tggctggcg gctccggcg<br>tgggatggca gtggagggg accctcttc ctaacgggt<br>tataaaaaca ggcctcgg                           |

Supplementary file 2: Table S2. MiRNA targets.

|                 |                 |                 |                |                |                |
|-----------------|-----------------|-----------------|----------------|----------------|----------------|
| cel-miR-39-3p   | hsa-miR-141-3p  | hsa-miR-17-5p   | hsa-miR-210-3p | hsa-miR-22-5p  | hsa-miR-31-5p  |
| hsa-let-7a-5p   | hsa-miR-142-5p  | hsa-miR-182-5p  | hsa-miR-21-5p  | hsa-miR-23a-3p | hsa-miR-34a-5p |
| hsa-miR-101-3p  | hsa-miR-143-3p  | hsa-miR-183-5p  | hsa-miR-218-5p | hsa-miR-25-3p  | hsa-miR-375-3p |
| hsa-miR-106a-5p | hsa-miR-145-5p  | hsa-miR-186-5p  | hsa-miR-221-3p | hsa-miR-26a-5p | hsa-miR-451a   |
| hsa-miR-1225-3p | hsa-miR-148a-3p | hsa-miR-195-5p  | hsa-miR-222-3p | hsa-miR-26b-5p | hsa-miR-497-5p |
| hsa-miR-124-3p  | hsa-miR-148b-3p | hsa-miR-203a-3p | hsa-miR-223-3p | hsa-miR-27a-3p | hsa-miR-92a-3p |
| hsa-miR-126-3p  | hsa-miR-155-5p  | hsa-miR-205-5p  | hsa-miR-22-3p  | hsa-miR-29c-3p | hsa-miR-9-5p   |
| hsa-miR-133a-3p | hsa-miR-16-5p   | hsa-miR-20a-5p  | hsa-miR-224-5p | hsa-miR-30a-5p | hsa-miR-96-5p  |

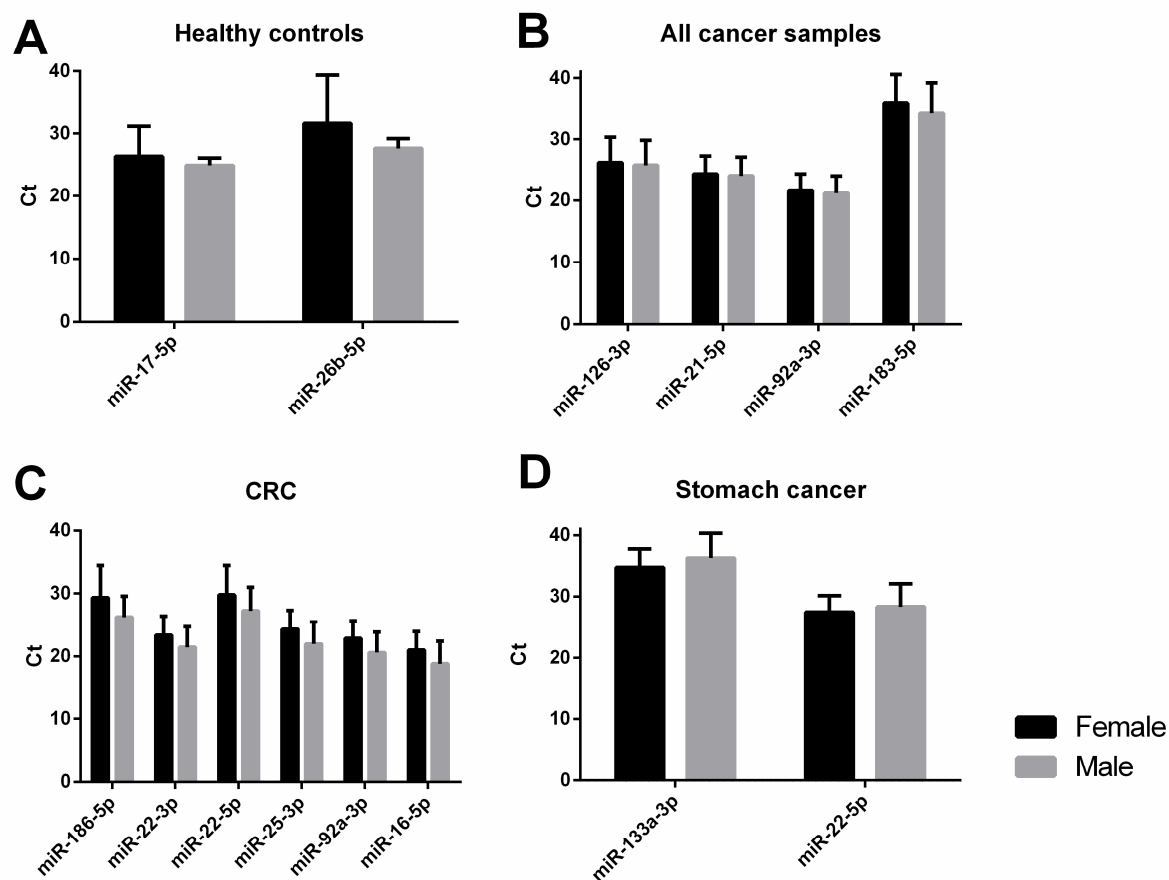

Supplementary file 2: Figure S1. Abundance of miRNAs in plasma samples across the different study groups. Only the mean Ct values of differentially expressed miRNAs between female and male participants (after normalization and adjustments for covariates) are depicted in this figure. Bars represent the mean value with standard deviation (SD). **A** Healthy control group  $n$  female = 8,  $n$  male = 7 **B** All cancer samples,  $n$  female = 48,  $n$  male = 80 **C** Colorectal cancer group,  $n$  female = 14,  $n$  male = 14 **D** Stomach cancer,  $n$  female = 15,  $n$  male = 8

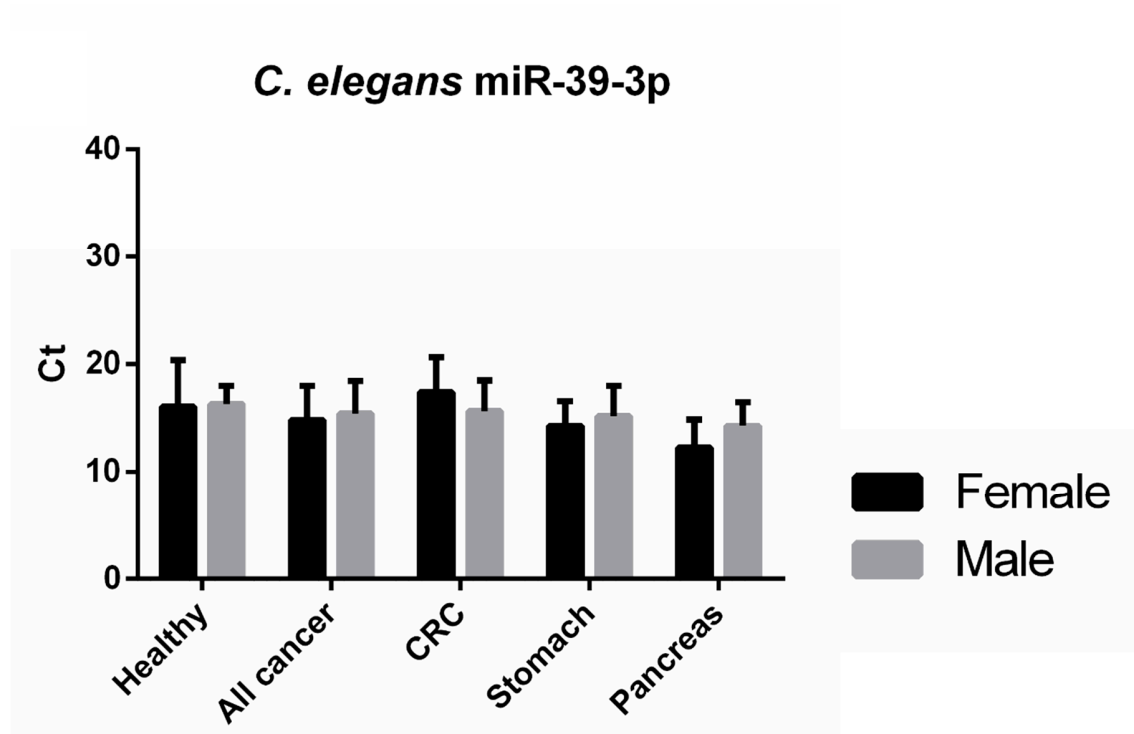

Supplementary file 2: Figure S2. Abundance of *C. elegans* miR-39-3p spike-in control across the different study groups. 15 fmol of *C. elegans* miR-39-3p was added to each sample during RNA extraction. Bars represent the mean Ct value with SD.
